# Supplementary material for: Selective hydrogenation of lignin to produce chemical commodities by using a biochar supported Ni–Mo2C catalyst obtained from biomass
Source: Royal Society of Chemistry journal article supplement (doi:10.1039/c6gc00247a), 2016-01-01
Supplement: c6gc00247a1.pdf [file c6gc00247a1.pdf]

One-pot preparation of biochar supported Ni-Mo<sub>2</sub>C catalyst for selective  
hydrogenation of lignin

Yuan-Ying Wang, Li-Li Ling, Hong Jiang\*

CAS Key Laboratory of Urban Pollutant Conversion, Department of Chemistry,  
University of Science and Technology of China, Hefei 230026, China

**Corresponding author:**

Dr. Hong Jiang, Fax: +86-551-63607482; E-mail: [jhong@ustc.edu.cn](mailto:jhong@ustc.edu.cn)

Table S1 The nickel and molybdenum content of catalysts prepared by one-pot method (Ni-Mo<sub>2</sub>C/C, Ni/C and Mo<sub>2</sub>C/C) and catalyst prepared by chemical reduction method (Ni-MoO<sub>2</sub>/C) detected by flame atom absorption method.

| sample           | Ni-Mo <sub>2</sub> C/C | Ni/C  | Mo <sub>2</sub> C/C | Ni-MoO <sub>2</sub> /C |
|------------------|------------------------|-------|---------------------|------------------------|
| Ni content (wt%) | 14.20                  | 48.89 | 0                   | 5.25                   |
| Mo content (wt%) | 11.83                  | 0     | 16.33               | 22.31                  |

Table S2 The elemental composition of the catalysts tested by elemental analyzer (VARIO EL III, Elementar, Germany).

| Catalyst               | Elemental composition (wt.%) |       |      |
|------------------------|------------------------------|-------|------|
|                        | N                            | C     | H    |
| Ni-Mo <sub>2</sub> C/C | 0.51                         | 45.97 | 1.59 |
| Ni/C                   | 0.21                         | 51.55 | 1.07 |
| Mo <sub>2</sub> C/C    | 0.82                         | 33.1  | 2    |

Table S3 The surface properties of one-pot prepared catalysts characterized by BET.

| Textural characteristic              | Ni-Mo <sub>2</sub> C/C | Ni/C   | Mo <sub>2</sub> C/C |
|--------------------------------------|------------------------|--------|---------------------|
| BET surface area (m <sup>2</sup> /g) | 220.47                 | 150.20 | 208.04              |
| BJH average pore diameter (nm)       | 10.6                   | 10.9   | 6.0                 |
| Pore volum (cm <sup>3</sup> /g)      | 0.162                  | 0.243  | 0.110               |

Table S4 The element contents of Ni-Mo<sub>2</sub>C/C catalyst detected by XPS.

| Element      | Mo    | C     | N    | O    | Ni   |
|--------------|-------|-------|------|------|------|
| Mass ratio % | 19.73 | 60.71 | 7.14 | 8.45 | 3.96 |

Table S5 Compounds and peak areas in liquid products determined by GC-MS.

Reaction conditions: 1.0 g of lignin, 0.25 g of Ni-Mo<sub>2</sub>C/C catalyst, initial 2.0 MPa H<sub>2</sub>, 100 mL isopropanol, 523 K, 2 h.

| RT <sup>a</sup> (min) | Compounds                                              | Peak area (%) |
|-----------------------|--------------------------------------------------------|---------------|
| 11.96                 | Phenol                                                 | 1.62          |
| 15.18                 | 2-methoxy-phenol                                       | 2.71          |
| 16.02                 | 2-ethylhexanoic acid                                   | 1.61          |
| 17.48                 | 4-ethylphenol                                          | 11.36         |
| 18.20                 | 2-methoxy-4-methylphenol                               | 1.53          |
| 19.06                 | 2,3-dihydrobenzofuran                                  | 0.58          |
| 20.58                 | 4-ethyl-2-methoxyphenol                                | 9.68          |
| 21.59                 | 2-methoxy-4-vinylphenol                                | 0.85          |
| 22.51                 | 2,6-dimethoxyphenol                                    | 6.27          |
| 22.94                 | 2-methoxy-4-propylphenol                               | 0.61          |
| 23.60                 | 2,3,4,5-tetrahydroxypentanal                           | 0.92          |
| 24.08                 | 1-(2-methylenecyclopropyl)benzene                      | 0.97          |
| 24.91                 | 4-hydroxy-3-methoxybenzoic acid                        | 2.16          |
| 25.13                 | Phenol, 2-methoxy-4-(1-propenyl)-, (E)-                | 1.84          |
| 25.56                 | unidentified                                           | 2.57          |
| 26.02                 | 1-(4-hydroxy-3-methoxyphenyl)ethanone                  | 1.05          |
| 26.79                 | 5-tert-Butylpyrogallol                                 | 4.73          |
| 26.98                 | Homovanillyl alcohol                                   | 0.48          |
| 28.58                 | 4-allyl-2,6-dimethoxyphenol                            | 0.62          |
| 28.74                 | 4-propyl-1,1'-diphenyl                                 | 1.36          |
| 28.96                 | 3-hydroxy-4-methoxybenzoic acid                        | 0.41          |
| 29.79                 | 2-methylindene                                         | 0.73          |
| 29.98                 | 4-hydroxy-3,5-dimethoxybenzaldehyde                    | 0.93          |
| 30.03                 | benzeneacetic acid, 4-hydroxy-3-methoxy-, methyl ester | 0.96          |
| 30.36                 | (2E)-4-(4-hydroxy-3-methoxyphenyl)-2-butanone oxime    | 0.81          |
| 30.55                 | benzenepropanoic acid, 4-hydroxy-, methyl ester        | 0.40          |
| 30.89                 | 4-allyl-2,6-dimethoxyphenol                            | 1.05          |
| 31.54                 | 1-(4-hydroxy-3,5-dimethoxyphenyl)ethanone              | 8.66          |
| 32.23                 | 3,5-Dimethoxy-4-hydroxyphenylacetic acid               | 0.45          |
| 32.49                 | methyl 2-hydroxy-2-(4-methoxyphenyl)acetate            | 0.83          |
| 33.40                 | (1,1'-Biphenyl)-2,2'-dicarboxaldehyde                  | 0.68          |
| 33.95                 | 4-hydroxy-3,5-dimethoxybenzoic acid                    | 0.92          |
| 34.25                 | 3,5-dimethoxy-4-hydroxyphenylacetic acid               | 1.28          |
| 34.67                 | methyl (3,4-dimethoxyphenyl)(hydroxy)acetate           | 0.57          |
| 35.50                 | unidentified                                           | 1.09          |
| 35.83                 | unidentified                                           | 4.40          |

|       |                                                                        |      |
|-------|------------------------------------------------------------------------|------|
| 36.81 | unidentified                                                           | 1.55 |
| 37.27 | 4,4'-ethylenediphenol                                                  | 0.53 |
| 38.55 | unidentified                                                           | 5.54 |
| 39.32 | unidentified                                                           | 2.46 |
| 39.42 | 2-(2'-methoxyphenyl)-2-(2'-hydroxyphenyl)propane                       | 1.22 |
| 39.61 | 1-(4-isopropyl-1,6-dimethyl-5,6,7,8-tetrahydronaphthalen-2-yl)ethanone | 0.94 |
| 39.68 | 6-acetyl-5-hydroxy-2,7-dimethyl-1,4-naphthoquinone                     | 1.46 |
| 42.13 | 3-ethoxy-4-methoxybenzaldehyde                                         | 0.64 |
| 42.40 | unidentified                                                           | 1.96 |
| 43.09 | dip-tolyl naphthalene-1,5-dicarboxylate                                | 0.99 |

<sup>a</sup> Retention time

Table S6 FTIR spectra peak position and assignments of Ni-Mo<sub>2</sub>C/C catalyst, original lignin, SR of Ni-Mo<sub>2</sub>C/C catalytic reaction and LP of Ni-Mo<sub>2</sub>C/C catalytic reaction.

| Wavelength<br>(cm)     | 3365      | 2800 and 3000 | 1600         | 1240 and 1100 |
|------------------------|-----------|---------------|--------------|---------------|
| Substance              | –OH       | C–H           | C=O          | C–O           |
| Ni-Mo <sub>2</sub> C/C | none      | none          | none         | none          |
| original lignin        | obviously | obviously     | slightly     | obviously     |
| SR                     | barely    | slightly      | barely       | slightly      |
| LP                     | obviously | dramatically  | dramatically | dramatically  |

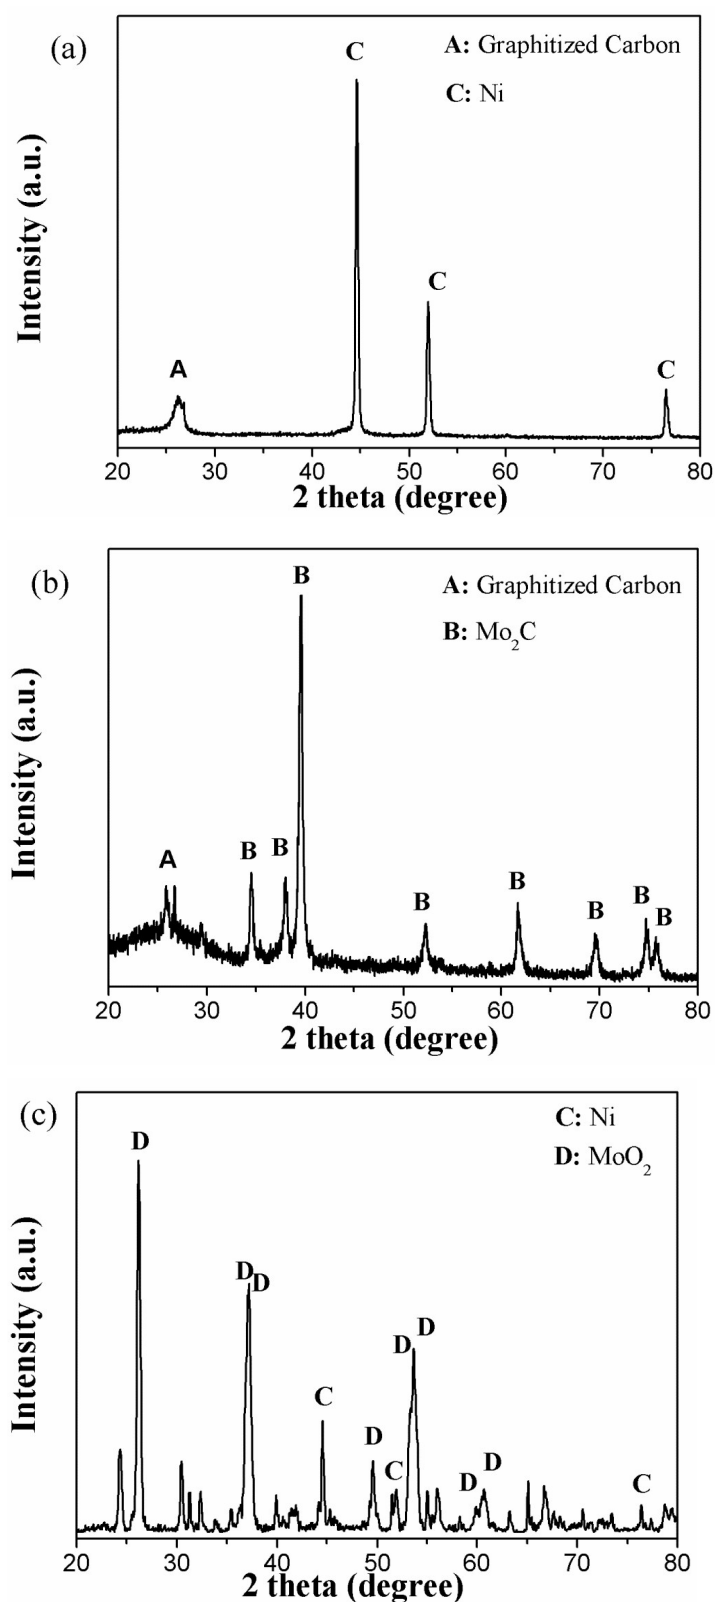

Fig. S1 XRD pattern of pyrolytically prepared Ni /C catalysts (a) and Mo<sub>2</sub>C/C (b); XRD pattern of chemically synthesized catalyst Ni-MoO<sub>2</sub>/C (c).

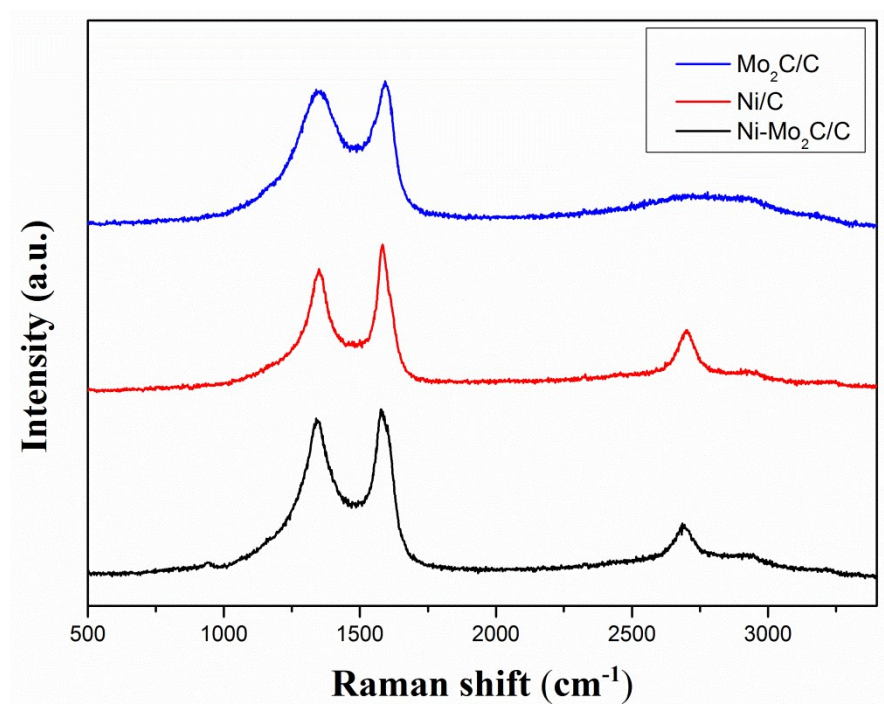

Fig. S2 Raman spectrum of pyrolytically prepared catalysts  $\text{Ni-Mo}_2\text{C}/\text{C}$ ,  $\text{Ni}/\text{C}$ , and  $\text{Mo}_2\text{C}/\text{C}$ .

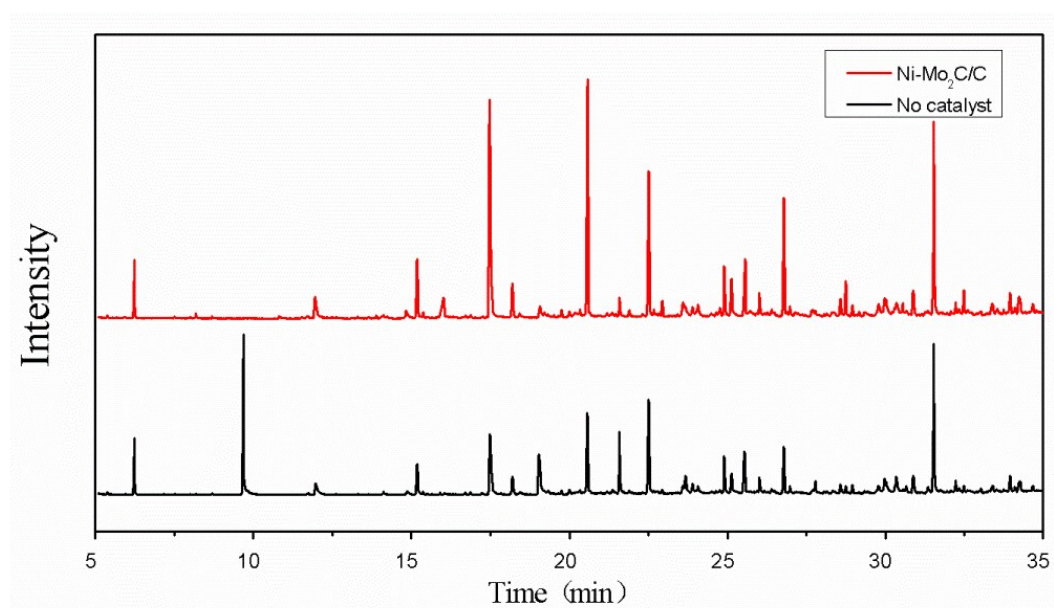

Fig.S3 The distribution of the products in liquid phase with Ni-Mo<sub>2</sub>C/C and without catalyst detected by GC-MS. Reaction conditions: 1.0 g of lignin, initial 2.0 MPa of H<sub>2</sub>, 100 mL of isopropanol, 523 K, 2 h.



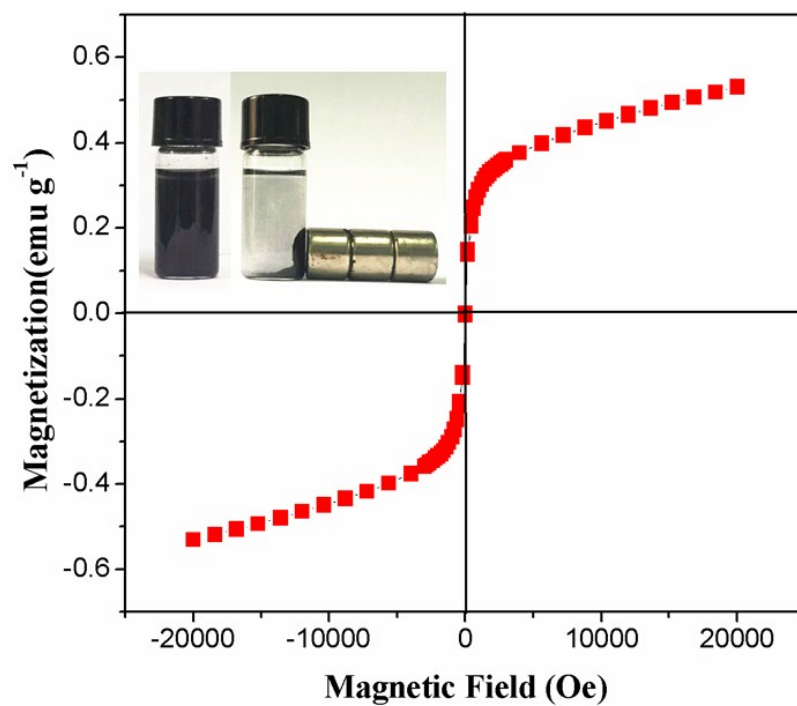

Fig.S4 Magnetic hysteresis loop of Ni-Mo<sub>2</sub>C/C catalyst recorded at 300 K, the photographs (inset) show that the catalyst can be separated by a magnet in 30 minutes.

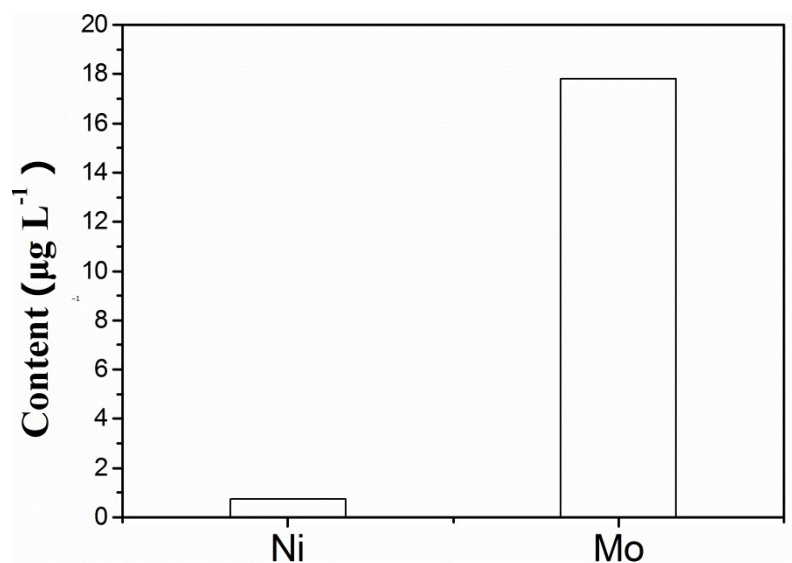

Fig.S5 The Ni and Mo element in liquid after reaction determined by the inductively coupled plasma-sector field mass spectrometry (ICP-SFMS, Plasma Quad 3, Thermo-VG Elemental, UK).

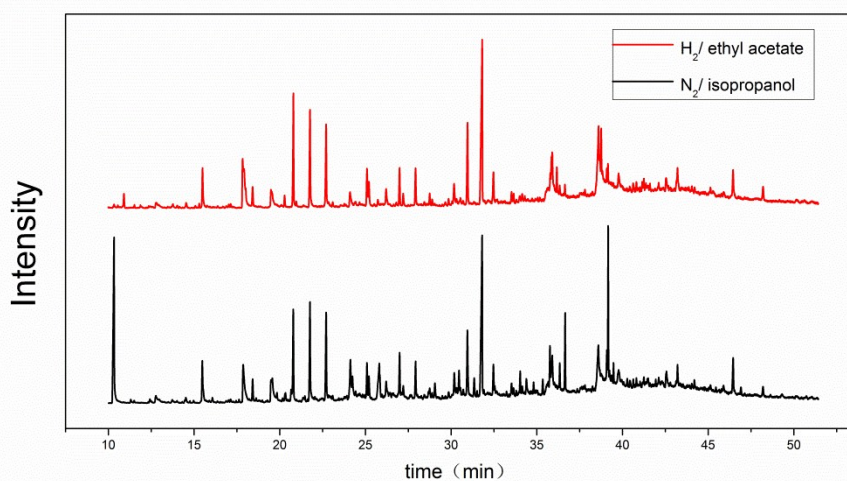

Fig.S6 The distribution of the products in liquid phase under different conditions determined by GC-MS. Reaction conditions: 1.0 g of lignin, 0.25 g of catalyst, initial pressure 2.0 MPa , 100 mL solvent, 523 K, 2 h.
